# Supplementary material for: Orthogonal deposition of Au on different facets of Ag cuboctahedra for the fabrication of nanoboxes with complementary surfaces
Source: Royal Society of Chemistry journal article supplement (doi:10.1039/c9nr08420g), 2019-11-22
Supplement: c9nr08420g1.pdf [file c9nr08420g1.pdf]

# **Orthogonal Deposition of Au on Different Facets of Ag Cuboctahedra for the Fabrication of Nanoboxes with Complementary Surfaces**

*Jaewan Ahn,<sup>†</sup> Junki Kim,<sup>†</sup> and Dong Qin\**

School of Materials Science and Engineering, Georgia Institute of Technology, Atlanta, Georgia  
30332, United States

<sup>†</sup>These authors contributed equally to this work.

\*Corresponding author: [dong.qin@mse.gatech.edu](mailto:dong.qin@mse.gatech.edu)

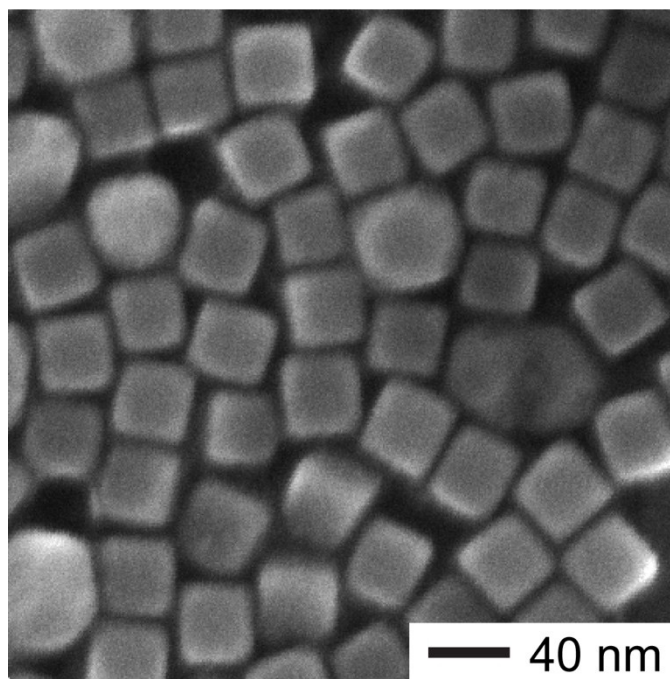

**Figure S1.** SEM images of Ag nanocubes with an average edge length of  $38.1 \pm 2.0$  nm.

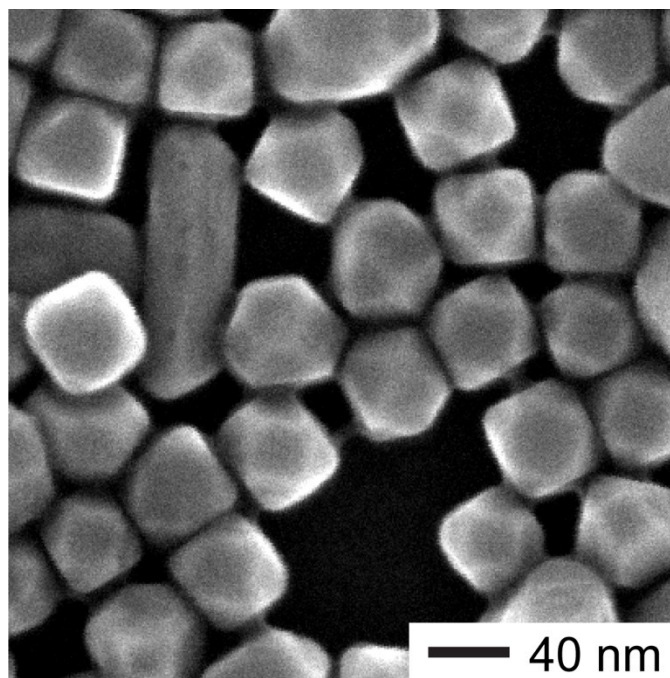

**Figure S2.** SEM images of Ag cuboctahedra with an average edge length of an average edge length of  $47.2 \pm 2.2$  nm.

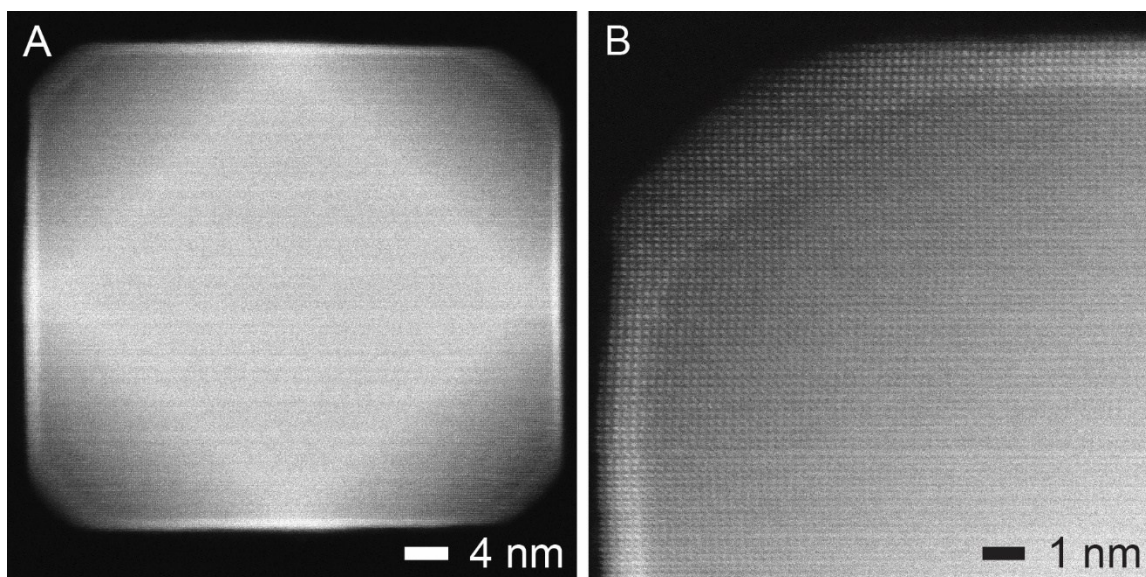

Figure S3. Two atomic-resolution HAADF-STEM images of the as-prepared  $\text{Ag}@\text{Au}_{\{100\}}$  cuboctahedron taken at different magnifications.

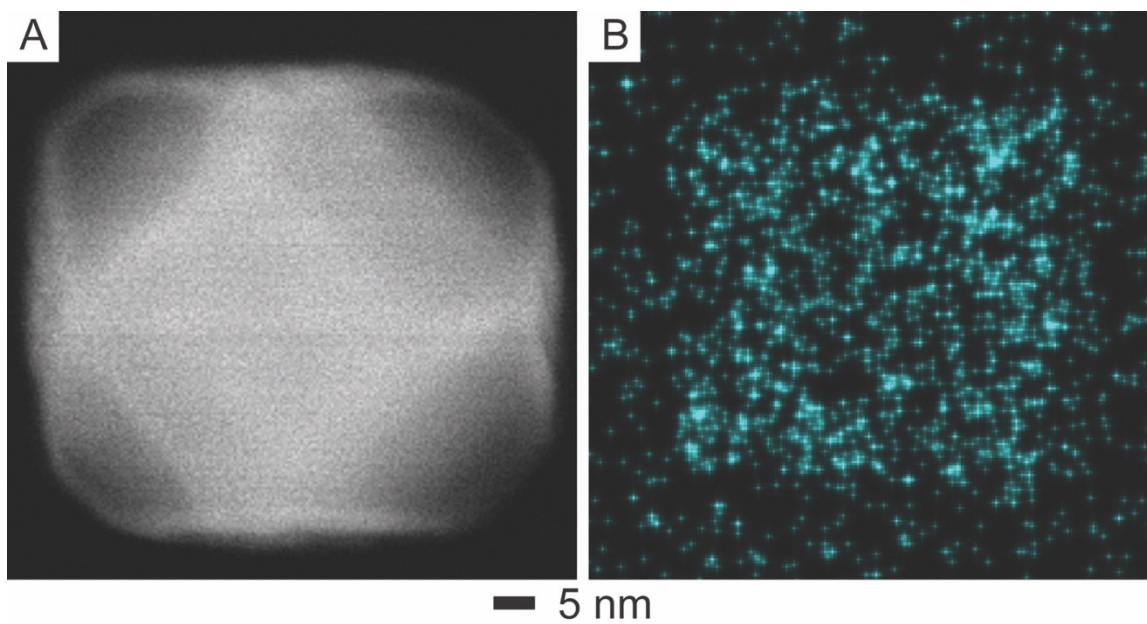

Figure S4. (A) HAADF-STEM image of one  $\text{Ag@Au}_{\{100\}}$  cuboctahedron that was orientated along the  $\langle 001 \rangle$  zone axis. (B) EDS mapping of oxygen from the nanocrystal in (A).

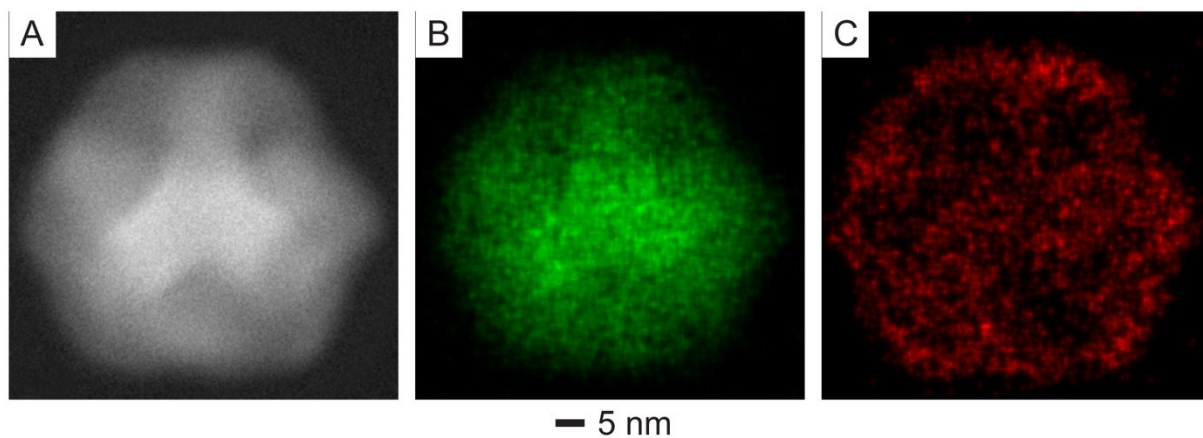

**Figure S5.** (A) HAADF-STEM image of one  $\text{Ag@Ag-Au}_{\{111\}}$  concave cuboctahedron that was orientated along the  $\langle 111 \rangle$  zone axis. (B, C) the EDS mapping of the same concave cuboctahedron (green: Ag; red: Au).
